# Supplementary material for: The 5p15.33 Locus Is Associated with Risk of Lung Adenocarcinoma in Never-Smoking Females in Asia
Source: PLoS Genet. 2010 Aug 5;6(8):e1001051. doi: 10.1371/journal.pgen.1001051 (PMC2916850; doi:10.1371/journal.pgen.1001051)
Supplement: Table S4 — Lung cancer risk associated with chromosome 5 SNPs, among never-smoking females from East Asia. (0.05 MB XLS) [file pgen.1001051.s006.xls]

## Sheet: Table S4
Table S4: Lung cancer risk associated with chromosome 5 SNPs, among never-smoking females from East Asia
		all lung cancers							adenocarcinomas					squamous cell carcinomas
rs number	Genotype	Controls	%	Cases	%	OR‡	95%CI‡	p	Cases	%	OR‡	95%CI‡	p	Cases	%	OR‡	95%CI‡	p
rs2736122	CC	2155	87.8516	2212	87.8475	reference			1674	87.8279	reference			178	91.7526	reference
	CT	288	11.7407	295	11.7156	1.00175	0.84-1.19	0.984234	225	11.8048	1.01558	0.84-1.22	0.870711	15	7.73196	0.628841	0.37-1.08	0.0930245
	TT	10	0.407664	11	0.436855	1.08286	0.46-2.56	0.855997	7	0.367261	0.959027	0.36-2.53	0.932657	1	0.515464	1.121	0.14-8.84	0.91368
	dominant model	298	12.1484	306	12.1525	1.00445	0.85-1.19	0.959257	232	12.1721	1.01374	0.84-1.22	0.884143	16	8.24742	0.646477	0.38-1.09	0.104006
	trend					1.00685	0.86-1.18	0.934105			1.01104	0.85-1.20	0.902138			0.681085	0.41-1.12	0.130669
rs2075786	CC	66	2.59536	67	2.61821	reference			51	2.62616	reference			4	2.05128	reference
	CT	711	27.9591	708	27.6671	0.976311	0.68-1.39	0.894923	536	27.6004	0.974453	0.66-1.43	0.894672	55	28.2051	1.26277	0.44-3.60	0.662107
	TT	1766	69.4455	1784	69.7147	0.991227	0.70-1.40	0.96025	1355	69.7734	0.99647	0.69-1.45	0.985181	136	69.7436	1.24885	0.45-3.48	0.670845
	dominant model	2477	97.4046	2492	97.3818	0.986927	0.70-1.39	0.940358	1891	97.3738	0.990093	0.68-1.44	0.958076	191	97.9487	1.25285	0.45-3.48	0.665058
	trend					1.00897	0.91-1.12	0.867762			1.01477	0.91-1.14	0.799895			1.02427	0.77-1.36	0.86758
rs4246742	AA	988	39.0823	936	36.6054	reference			685	35.2911	reference			71	36.4103	reference
	AT	1170	46.2816	1224	47.8686	1.10297	0.98-1.24	0.11078	946	48.7378	1.15222	1.01-1.31	0.0330817	96	49.2308	1.15491	0.84-1.59	0.37611
	TT	370	14.6361	397	15.526	1.12827	0.95-1.33	0.158911	310	15.9711	1.18853	0.99-1.42	0.0603456	28	14.359	1.06944	0.68-1.68	0.772091
	dominant model	1540	60.9177	1621	63.3946	1.10886	0.99-1.24	0.075185	1256	64.7089	1.16095	1.03-1.31	0.0176114	124	63.5897	1.1345	0.84-1.54	0.414704
	trend					1.07117	0.99-1.16	0.0916475			1.10316	1.01-1.20	0.0252024			1.06021	0.86-1.31	0.586074
rs4975605	GG	2029	80.2611	2060	80.6894	reference			1560	80.4954	reference			158	81.4433	reference
	GT	469	18.5522	469	18.3705	0.978701	0.85-1.13	0.766735	361	18.6275	0.983969	0.84-1.15	0.835784	33	17.0103	0.920994	0.62-1.36	0.679041
	TT	30	1.18671	24	0.940071	0.782714	0.46-1.34	0.374379	17	0.877193	0.725999	0.40-1.32	0.295259	3	1.54639	1.28948	0.39-4.27	0.67751
	dominant model	499	19.7389	493	19.3106	0.966855	0.84-1.11	0.634752	378	19.5046	0.968457	0.83-1.12	0.674496	36	18.5567	0.943521	0.65-1.37	0.762123
	trend					0.958473	0.84-1.09	0.516845			0.956187	0.83-1.10	0.525302			0.971787	0.69-1.37	0.869511
rs2242652	CC	1116	69.145	1094	66.3835	reference			893	65.4692	reference			75	71.4286	reference
	CT	455	28.1908	499	30.2791	1.12331	0.96-1.31	0.134509	423	31.0117	1.1666	0.99-1.37	0.0579397	30	28.5714	0.974135	0.63-1.51	0.906579
	TT	43	2.66419	55	3.33738	1.34338	0.89-2.02	0.157408	48	3.51906	1.43841	0.94-2.20	0.09187			7.40087e-07	0.00-I	0.983558
	dominant model	498	30.855	554	33.6165	1.14193	0.99-1.32	0.0775311	471	34.5308	1.18955	1.02-1.39	0.0272324	30	28.5714	0.891321	0.58-1.38	0.60579
	trend					1.13532	1.00-1.29	0.0529217			1.17779	1.03-1.35	0.0167478			0.821526	0.55-1.23	0.337678
rs2736100*	TT	1117	36.4318	695	25.7217	reference			502	24.6078	reference			64	32.8205	reference
	TG	1493	48.6954	1411	52.2206	1.51926	1.35-1.71	6.79493e-12	1089	53.3824	1.62298	1.42-1.85	4.54222e-13	91	46.6667	1.05507	0.76-1.47	0.749781
	GG	456	14.8728	596	22.0577	2.10092	1.80-2.45	4.43114e-21	449	22.0098	2.19002	1.85-2.59	4.74892e-20	40	20.5128	1.52128	1.01-2.29	0.0450975
	dominant model	1949	63.5682	2007	74.2783	1.65536	1.48-1.85	2.99545e-18	1538	75.3922	1.75567	1.55-1.99	9.30888e-19	131	67.1795	1.16403	0.86-1.58	0.334139
	trend					1.4585	1.35-1.57	2.05342e-22			1.49554	1.38-1.62	1.15813e-21			1.20937	0.98-1.49	0.0744899
rs2853676	AA	92	3.62919	93	3.66286	reference			66	3.41969	reference			8	4.16667	reference
	AG	693	27.3373	751	29.5786	1.06426	0.78-1.45	0.690348	571	29.5855	1.13894	0.81-1.59	0.447475	55	28.6458	0.907121	0.42-1.97	0.804906
	GG	1750	69.0335	1695	66.7586	0.95211	0.71-1.28	0.745288	1293	66.9948	1.02298	0.74-1.42	0.890944	129	67.1875	0.845441	0.40-1.78	0.658501
	dominant model	2443	96.3708	2446	96.3371	0.98392	0.73-1.32	0.913896	1864	96.5803	1.05579	0.76-1.46	0.741426	184	95.8333	0.862848	0.41-1.81	0.695302
	trend					0.926016	0.84-1.02	0.132634			0.940598	0.84-1.05	0.267179			0.926658	0.71-1.20	0.568749
rs2853668	AA	210	8.27423	266	10.3906	reference			209	10.7566	reference			25	12.8205	reference
	AC	1058	41.6864	1061	41.4453	0.791763	0.65-0.97	0.0222114	811	41.7396	0.776391	0.63-0.96	0.019689	67	34.359	0.528598	0.33-0.86	0.00966808
	CC	1270	50.0394	1233	48.1641	0.771062	0.63-0.94	0.00987294	923	47.5039	0.745044	0.60-0.92	0.0060304	103	52.8205	0.677949	0.43-1.08	0.098486
	dominant model	2328	91.7258	2294	89.6094	0.780535	0.65-0.94	0.0106388	1734	89.2434	0.759415	0.62-0.93	0.00754128	170	87.1795	0.609991	0.39-0.95	0.0288349
	trend					0.914261	0.84-0.99	0.0373302			0.898783	0.82-0.98	0.0210952			0.957792	0.77-1.20	0.706802
rs2735845	GG	1126	44.2958	1074	41.9367	reference			801	41.2249	reference			90	46.1538	reference
	GC	1140	44.8466	1137	44.3967	1.04229	0.93-1.17	0.489134	867	44.6217	1.05775	0.93-1.20	0.38571	76	38.9744	0.836823	0.61-1.15	0.269822
	CC	276	10.8576	350	13.6665	1.318	1.10-1.58	0.00249585	275	14.1534	1.36647	1.13-1.65	0.00133262	29	14.8718	1.32395	0.85-2.05	0.210569
	dominant model	1416	55.7042	1487	58.0633	1.09573	0.98-1.22	0.106708	1142	58.7751	1.11793	0.99-1.26	0.0684919	105	53.8462	0.931266	0.70-1.25	0.63321
	trend					1.11492	1.03-1.21	0.00878929			1.13522	1.04-1.24	0.00451846			1.05291	0.85-1.31	0.641715
rs4635969	CC	1966	77.7382	2073	81.0082	reference			1571	80.8128	reference			159	81.9588	reference
	CT	528	20.8778	467	18.2493	0.836366	0.73-0.96	0.0119608	360	18.5185	0.839923	0.72-0.98	0.0227287	34	17.5258	0.809917	0.55-1.19	0.281881
	TT	35	1.38395	19	0.742478	0.510036	0.29-0.89	0.0189329	13	0.668724	0.453556	0.24-0.86	0.0155889	1	0.515464	0.360102	0.05-2.64	0.315396
	dominant model	563	22.2618	486	18.9918	0.816022	0.71-0.94	0.00351838	373	19.1872	0.815756	0.70-0.95	0.00674221	35	18.0412	0.782137	0.54-1.14	0.204
	trend					0.811641	0.72-0.92	0.00124153			0.807254	0.70-0.93	0.00220193			0.774228	0.54-1.10	0.15781
rs6554759	TT	2298	90.5794	2324	90.7812	reference			1769	91.0448	reference			174	89.2308	reference
	CT	237	9.34174	230	8.98438	0.958774	0.79-1.16	0.664921	170	8.74936	0.925852	0.75-1.14	0.465596	20	10.2564	1.11178	0.69-1.80	0.666691
	CC	2	0.0788333	6	0.234375	3.23488	0.65-16.07	0.15122	4	0.205867	3.26301	0.59-17.91	0.173389	1	0.512821	6.04137	0.54-67.41	0.143882
	dominant model	239	9.42058	236	9.21875	0.977091	0.81-1.18	0.810083	174	8.95522	0.942962	0.77-1.16	0.57506	21	10.7692	1.15671	0.72-1.86	0.545903
	trend					0.996952	0.83-1.20	0.974096			0.962474	0.79-1.18	0.708938			1.19987	0.76-1.89	0.433853
rs380286	CC	1871	73.5745	1964	76.7787	reference			1494	77.0103	reference			150	76.9231	reference
	CT	624	24.5379	553	21.6185	0.841253	0.74-0.96	0.00978469	417	21.4948	0.822884	0.71-0.95	0.00711666	41	21.0256	0.826958	0.58-1.18	0.298046
	TT	48	1.88753	41	1.60281	0.817088	0.54-1.25	0.347996	29	1.49485	0.758583	0.48-1.21	0.24612	4	2.05128	1.0488	0.37-2.95	0.928043
	dominant model	672	26.4255	594	23.2213	0.839529	0.74-0.95	0.00720444	446	22.9897	0.818326	0.71-0.94	0.00446832	45	23.0769	0.842781	0.60-1.19	0.331738
	trend					0.85725	0.76-0.96	0.00868128			0.834756	0.74-0.95	0.00469253			0.877607	0.64-1.20	0.410807
rs402710	AA	304	10.6892	221	8.3114	reference			165	8.23764	reference			16	8.08081	reference
	AG	1124	39.5218	1043	39.2253	1.27605	1.05-1.55	0.0131622	778	38.8417	1.27974	1.04-1.58	0.0216726	76	38.3838	1.26404	0.73-2.20	0.407415
	GG	1416	49.789	1395	52.4633	1.35474	1.12-1.64	0.00158476	1060	52.9206	1.37672	1.12-1.69	0.00231523	106	53.5354	1.41991	0.83-2.44	0.203452
	dominant model	2540	89.3108	2438	91.6886	1.31995	1.10-1.58	0.00279041	1838	91.7624	1.3339	1.09-1.63	0.00452879	182	91.9192	1.35066	0.80-2.28	0.261789
	trend					1.12376	1.04-1.22	0.00451395			1.13461	1.04-1.24	0.00455619			1.16296	0.93-1.45	0.183331
rs467095	AA	1735	69.7347	1812	73.6585	reference			1387	73.4251	reference			134	76.1364	reference
	AG	691	27.7733	596	24.2276	0.818494	0.72-0.93	0.00219902	466	24.6691	0.826923	0.72-0.95	0.00684829	36	20.4545	0.67523	0.46-0.99	0.0424673
	GG	62	2.49196	52	2.11382	0.801863	0.55-1.17	0.248187	36	1.90577	0.71726	0.47-1.09	0.118967	6	3.40909	1.2547	0.53-2.96	0.603832
	dominant model	753	30.2653	648	26.3415	0.817128	0.72-0.93	0.00145388	502	26.5749	0.817916	0.72-0.94	0.00324894	42	23.8636	0.722968	0.51-1.03	0.0758199
	trend					0.840883	0.75-0.94	0.00208216			0.832563	0.74-0.94	0.00267396			0.806314	0.59-1.11	0.180919
rs27064	AA	190	7.48326	227	8.8915	reference			176	9.09091	reference			21	10.7692	reference
	AG	1086	42.7727	1059	41.4806	0.817401	0.66-1.01	0.0606705	794	41.0124	0.794697	0.63-1.00	0.0453801	72	36.9231	0.59213	0.36-0.99	0.0442735
	GG	1263	49.744	1267	49.6279	0.842328	0.68-1.04	0.10629	966	49.8967	0.840098	0.67-1.05	0.124416	102	52.3077	0.718225	0.44-1.18	0.189888
	dominant model	2349	92.5167	2326	91.1085	0.830729	0.68-1.02	0.0709917	1760	90.9091	0.818883	0.66-1.02	0.0682195	174	89.2308	0.659817	0.41-1.06	0.0876679
	trend					0.964805	0.88-1.05	0.416163			0.973982	0.89-1.07	0.578752			0.975755	0.77-1.23	0.834741
‡Odds ratios (OR) and 95% confidence intervals (CI) adjusted for age and study center
*Data from GEL-S were included in Truong et al., (2010) J Natl Cancer Inst, In press and data from NJLCS were included in Jin et al., (2009) Carcinogenesis;30:987-990.
